# Supplementary material for: A fluorescent probe for benzenethiols and its application on test paper, in water samples and living cells
Source: Royal Society of Chemistry journal article supplement (doi:10.1039/c5tc01363a), 2015-01-01
Supplement: c5tc01363a1.pdf [file c5tc01363a1.pdf]

## Supporting Information (SI)

# A fluorescent probe for benzenethiols and its application on test paper, in water samples and living cells

Wenying Zhang,<sup>a</sup> Xingjiang Liu,<sup>b</sup> Hongyan Zhang,<sup>c</sup> Chengcheng Feng,<sup>a</sup> Chunxia Liu,<sup>a</sup> Mingming Yu,<sup>a\*</sup> Liuhe Wei<sup>a</sup> and Zhanxian Li<sup>a\*</sup>

<sup>a</sup> College of Chemistry and Molecular Engineering, Zhengzhou University

<sup>b</sup> College of Chemistry and Chemical Engineering, Central South University, Changsha, Hunan  
410083, China

<sup>c</sup> Key Laboratory of Photochemical Conversion and Optoelectronic Materials, Technical  
Institute of Physics and Chemistry, Chinese Academy of Sciences, Beijing, 100190, China

Corresponding Author

\*Fax: 86 371-67781205. E-mail: yummm@zzu.edu.cn; lizx@zzu.edu.cn.

## Figures

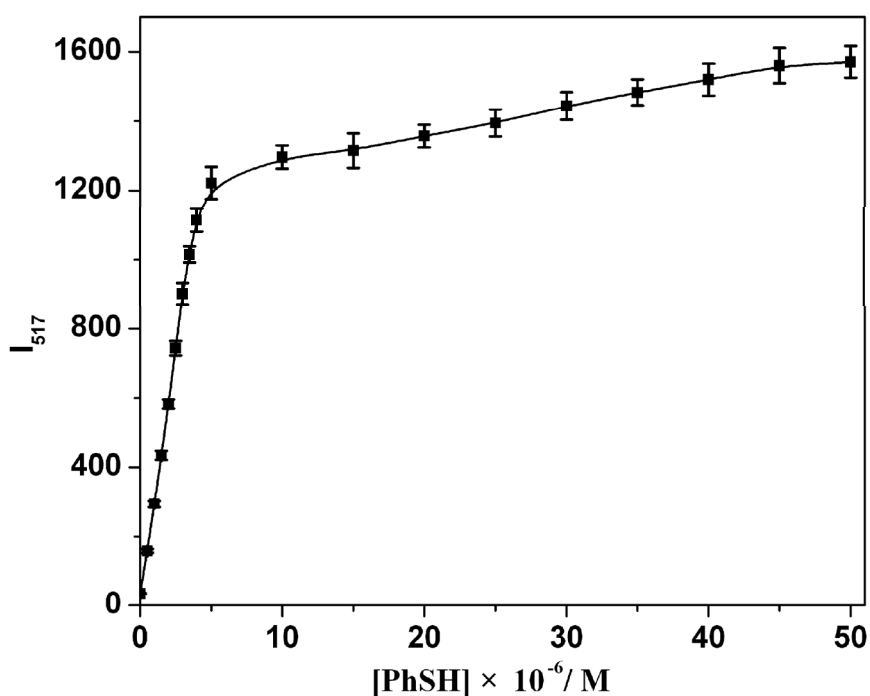

**Fig. S1** Emission intensity of compound **1** ( $5.0 \times 10^{-6}$  M,  $V_{\text{water}}:V_{\text{ethanol}} = 7:3$ ) at 517 nm (black square) as a function of addition of benzenethiol ethanol solution.

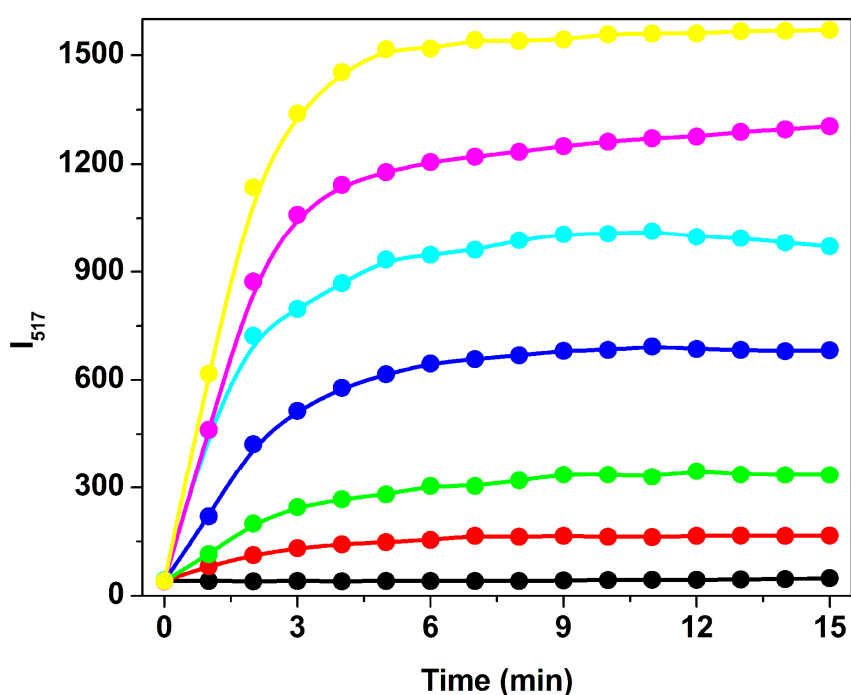

**Fig. S2** Kinetic curves of probe **1** ( $5.0 \times 10^{-6}$  M,  $V_{\text{water}}:V_{\text{ethanol}} = 7:3$ ) at 517 nm with benzenethiol at different concentrations (the concentrations of benzenethiol are 0,  $5.0 \times 10^{-7}$  M,  $1.0 \times 10^{-6}$  M,  $2.5 \times 10^{-6}$  M,  $5.0 \times 10^{-6}$  M,  $7.5 \times 10^{-6}$  M, and  $1.0 \times 10^{-5}$  M from down to up). The excitation wavelength was 380 nm.

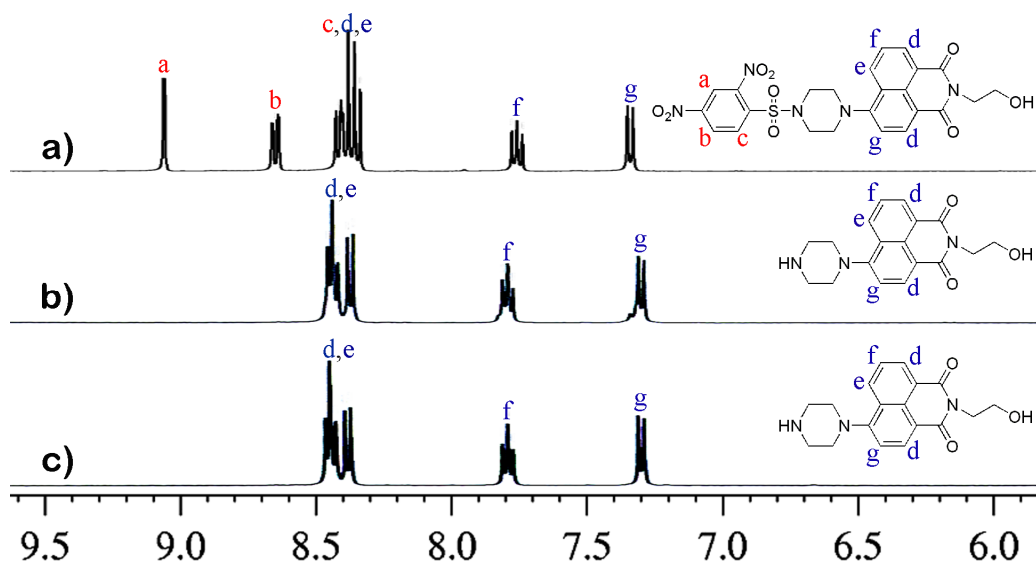

**Fig. S3** Partial  $^1\text{H}$  NMR spectra of **1** upon addition of benzenethiol in  $\text{DMSO-}d_6$ . (a) Only probe **1**, (b) the isolated product after probe **1** reacted with benzenethiol in mixture of water and ethanol, (c) the reference compound **2**.

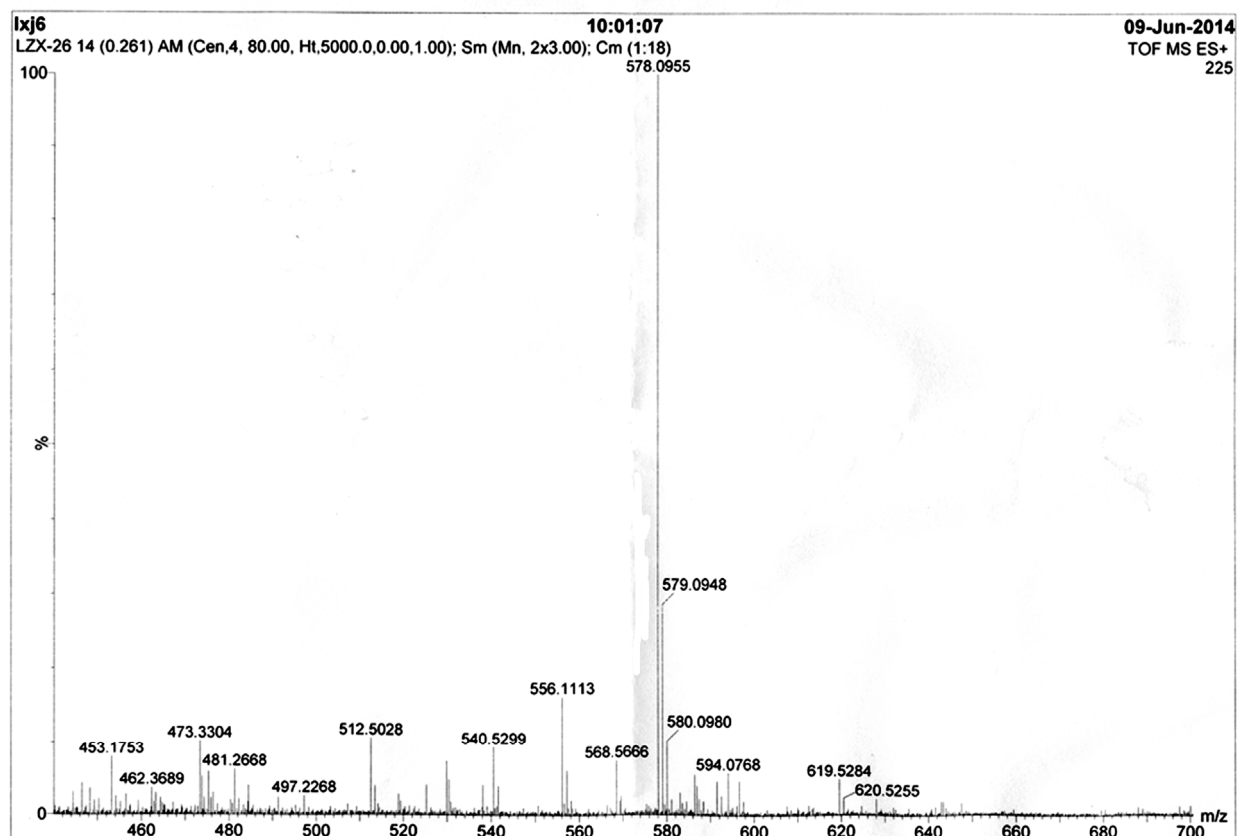

**Fig. S4** TOF mass spectra of **1**.

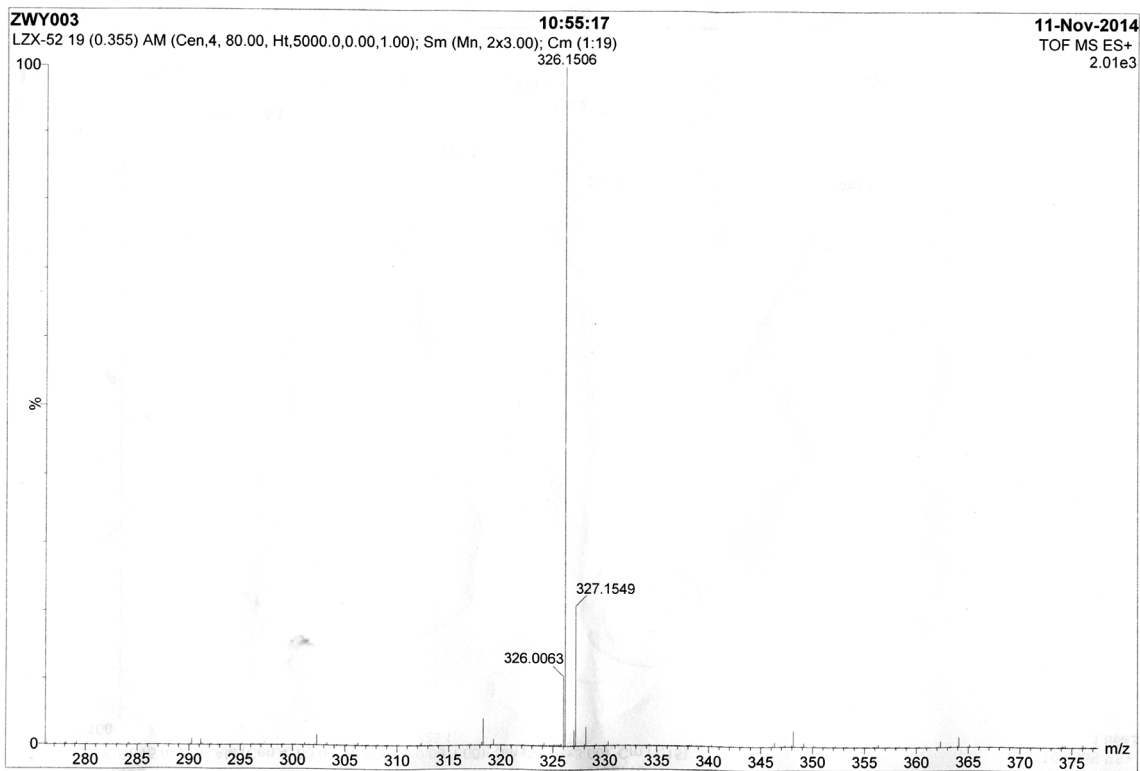

Fig. S5 TOF mass spectra of the product from the reaction of **1** with benzenethiol.

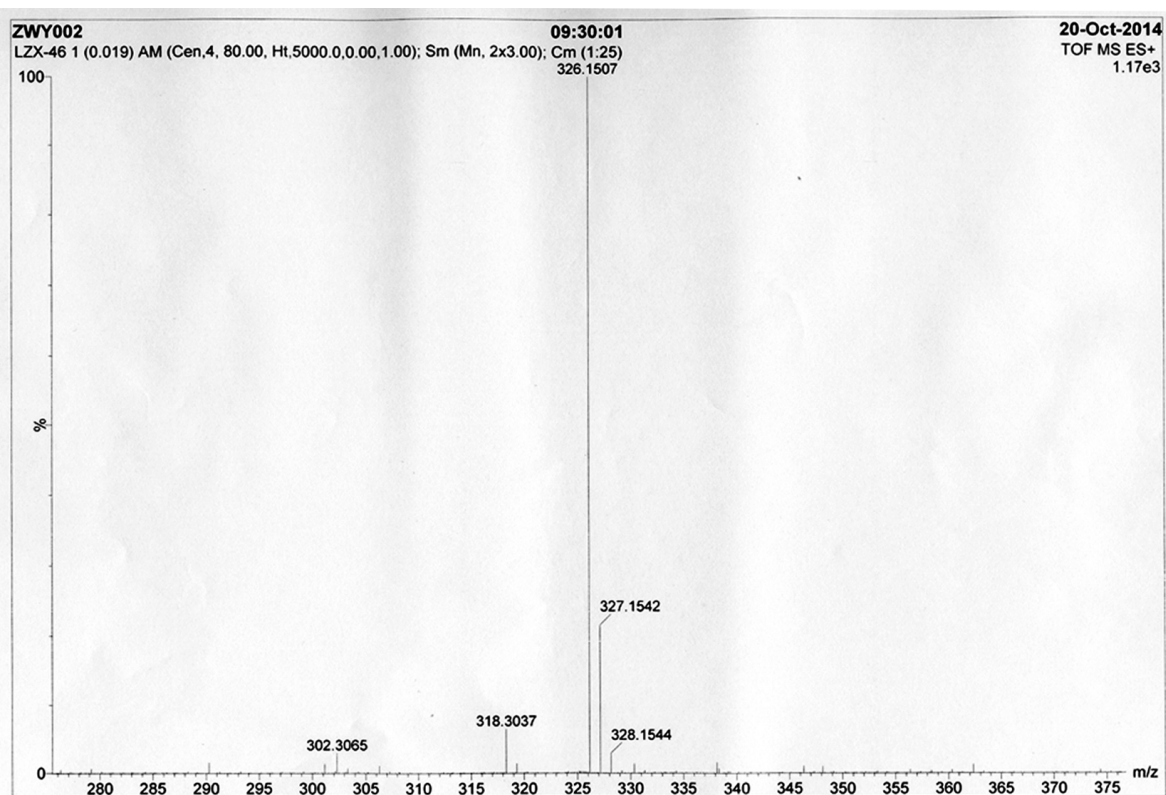

Fig. S6 TOF mass spectra of the product from compound **2**.

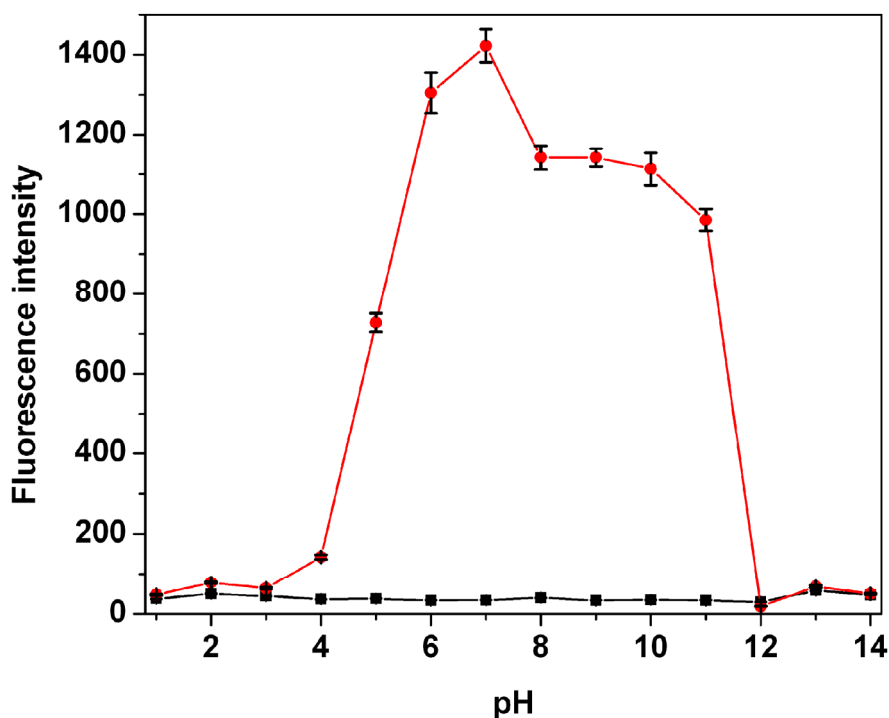

**Fig. S7** Fluorescence intensity change of **1** ( $5.0 \times 10^{-6}$  M,  $V_{\text{water}}:V_{\text{ethanol}} = 7:3$ ) before and after addition of benzenethiol with different pH.

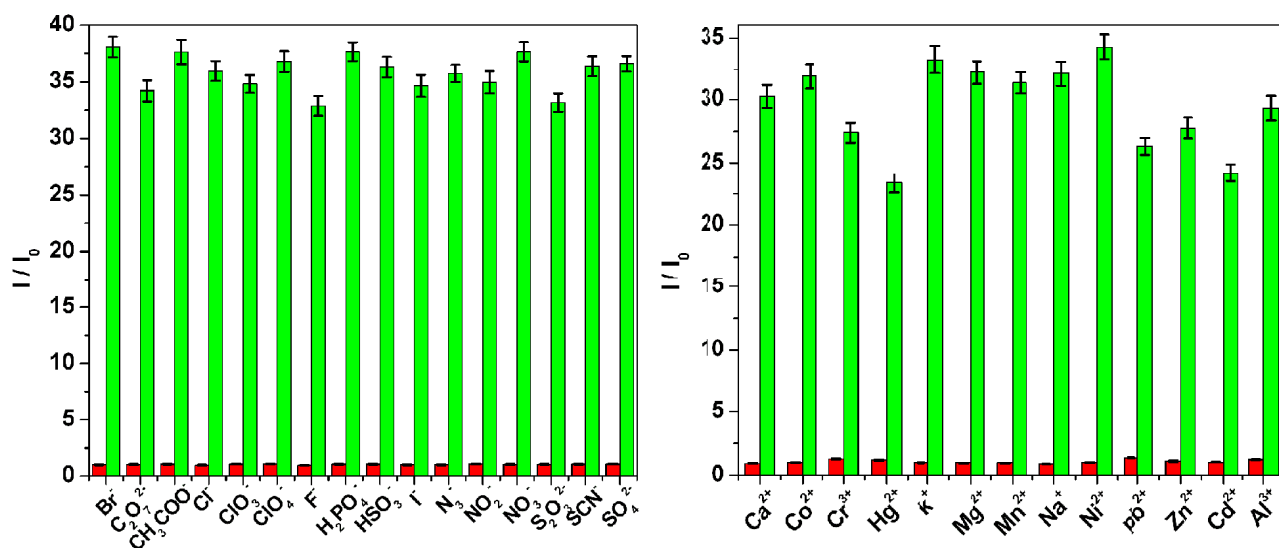

**Fig. S8** Fluorescence responses of **1** ( $5.0 \times 10^{-6}$  M,  $V_{\text{water}}:V_{\text{ethanol}} = 7:3$ ) upon addition of 10 equiv. of different anions (left, red bars) and 10 equiv. of metal ions (right, red bars). Fluorescence changes of the mixture of **1** and benzenethiol after addition of 2 equiv of anions (left, green bars) and 2 equiv of metal ions (right, green bars). The excitation wavelength was 380 nm.  $I_0$  represents the emission intensity at 517 nm in the fluorescence spectroscopy of compound **1**.  $I$  represents the emission intensity at 517 nm in the fluorescence spectroscopy of compound **1** after addition of the species to the solution of **1** (red bars) and of the mixture of **1** and benzenethiol after addition of an excess of the species (green bars). The anions and metal ions used were Br<sup>-</sup>, Cr<sub>2</sub>O<sub>7</sub><sup>2-</sup>, Cl<sup>-</sup>, ClO<sub>3</sub><sup>-</sup>, ClO<sub>4</sub><sup>-</sup>, F<sup>-</sup>, H<sub>2</sub>PO<sub>4</sub><sup>-</sup>, HSO<sub>3</sub><sup>-</sup>, NO<sub>2</sub><sup>-</sup>, NO<sub>3</sub><sup>-</sup>,

$\text{S}_2\text{O}_3^{2-}$ ,  $\text{SCN}^-$ ,  $\text{SO}_4^{2-}$ ,  $\text{Ca}^{2+}$ ,  $\text{Co}^{2+}$ ,  $\text{Cr}^{3+}$ ,  $\text{Hg}^{2+}$ ,  $\text{K}^+$ ,  $\text{Mg}^{2+}$ ,  $\text{Mn}^{2+}$ ,  $\text{Na}^+$ ,  $\text{Ni}^{2+}$ ,  $\text{Pb}^{2+}$ ,  $\text{Zn}^{2+}$ ,  $\text{Cd}^{2+}$ , and  $\text{Al}^{3+}$ .

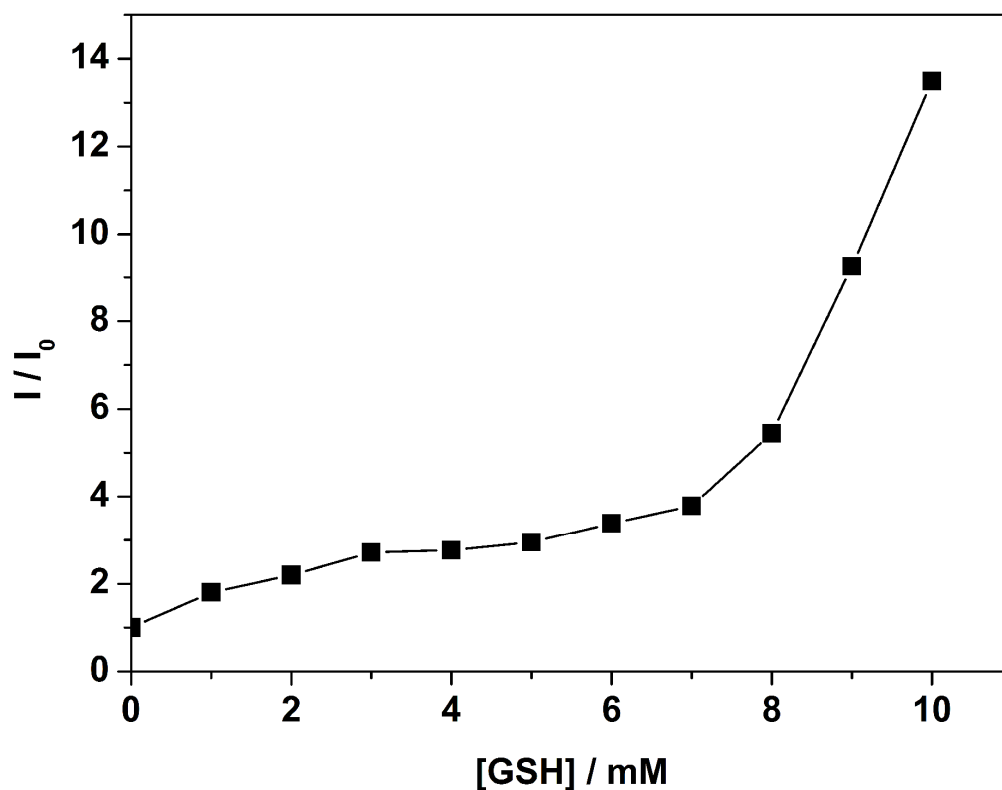

**Fig. S9** Fluorescence intensity of probe **1** ( $5.0 \times 10^{-6}$  M,  $V_{\text{water}}:V_{\text{ethanol}} = 7:3$ ) changes with the concentration of GSH from 1 to 10 mM. The excitation wavelength was 380 nm and the reaction time was 3 min.

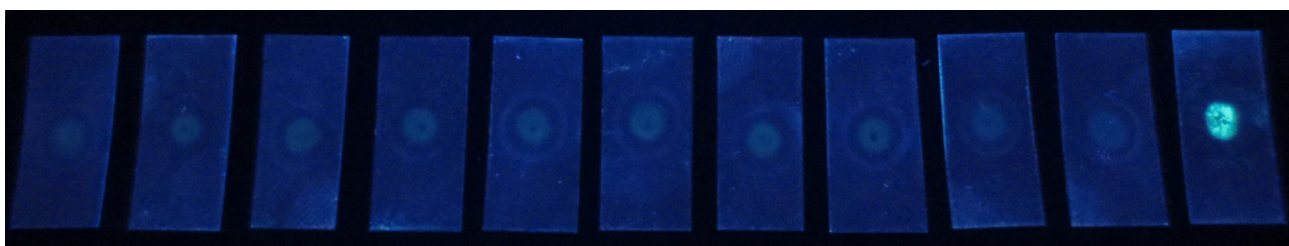

**Fig. S10** Images of test papers for the selectivity of benzenethiol upon addition of 10 mM of various species (From left to right, the species used were KI,  $\text{NaN}_3$ , PhOH,  $\text{PhNH}_2$ , Gly, Ala, Cys, GSH, and PhSH.) in aqueous solutions of **1** ( $5.0 \times 10^{-5}$  M,  $V_{\text{water}} : V_{\text{ethanol}} = 7:3$ ) under a UV lamp (365 nm).

**Table S1** Determination of benzenethiol concentrations in water samples.

| sample       | benzenethiol spiked ( $\mu\text{M}$ ) | benzenethiol ( $\mu\text{M}$ ) | recovered | Recovery (%) |
|--------------|---------------------------------------|--------------------------------|-----------|--------------|
| Tap water    | 0                                     | not detected                   |           |              |
|              | 0.5                                   | $0.53\pm 0.07$                 |           | 106          |
|              | 1                                     | $0.96\pm 0.06$                 |           | 96           |
|              | 1.5                                   | $1.43\pm 0.05$                 |           | 95           |
|              | 2                                     | $2.04\pm 0.12$                 |           | 102          |
|              | 2.5                                   | $2.53\pm 0.05$                 |           | 101          |
|              | 3                                     | $3.19\pm 0.02$                 |           | 106          |
|              | 3.5                                   | $3.43\pm 0.10$                 |           | 98           |
|              | 4                                     | $3.95\pm 0.01$                 |           | 99           |
| pond         | 0                                     | not detected                   |           |              |
|              | 0.5                                   | $0.45\pm 0.04$                 |           | 91           |
|              | 1                                     | $1.02\pm 0.04$                 |           | 102          |
|              | 1.5                                   | $1.53\pm 0.06$                 |           | 102          |
|              | 2                                     | $2.08\pm 0.11$                 |           | 104          |
|              | 2.5                                   | $2.48\pm 0.02$                 |           | 99           |
|              | 3                                     | $3.17\pm 0.02$                 |           | 106          |
|              | 3.5                                   | $3.51\pm 0.07$                 |           | 100          |
|              | 4                                     | $3.94\pm 0.05$                 |           | 98           |
| Eyebrow lake | 0                                     | not detected                   |           |              |
|              | 0.5                                   | $0.45\pm 0.02$                 |           | 90           |
|              | 1                                     | $0.99\pm 0.11$                 |           | 99           |
|              | 1.5                                   | $1.43\pm 0.06$                 |           | 96           |
|              | 2                                     | $1.94\pm 0.04$                 |           | 97           |
|              | 2.5                                   | $2.51\pm 0.12$                 |           | 100          |
|              | 3                                     | $3.12\pm 0.13$                 |           | 104          |
|              | 3.5                                   | $3.39\pm 0.04$                 |           | 97           |
|              | 4                                     | $4.00\pm 0.06$                 |           | 100          |
